# Supplementary material for: Optimal Software Development: A Control Theoretic Approach
Source: Atypon-hosted journal article supplement (doi:10.1287/isre.1050.0059), 2005-09-01
Supplement: isre.1050.0059-sm-debug.pdf [file isre.1050.0059-sm-debug.pdf]

# Online Supplement to Optimal Software Development: A Control Theoretic Approach

Yonghua Ji<sup>\*</sup> • Vijay S. Mookerjee<sup>+</sup> • Suresh P. Sethi<sup>+</sup>

<sup>\*</sup> *School of Business, University of Alberta, Edmonton, Alberta T6G 2R6*

<sup>+</sup> *School of Management, University of Texas at Dallas, Richardson, TX 75080*

{ [yji@ualberta.ca](mailto:yji@ualberta.ca) • [vijaym@utdallas.edu](mailto:vijaym@utdallas.edu) • [sethi@utdallas.edu](mailto:sethi@utdallas.edu) }

## Appendix A

We will encounter the following form of differential equation extensively in this paper:

$$\dot{m}(t) = f(t) \cdot m(t) + q(t) \quad (\text{A.1})$$

The solution to this equation with the initial condition  $m(t_1) = m_1$  is:

$$m(t) = e^{\int_0^t f(x) dx} \left[ e^{-\int_0^{t_1} f(x) dx} m_1 + \int_{t_1}^t q(x) \cdot e^{-\int_0^x f(y) dy} dx \right] \quad (\text{A.2})$$

### A. Proof of Theorem 1

We first discuss the general form of the solution and then derive the analytical expression. At the start of the project, the value of  $u$  should be 1, i.e., all effort must initially be allocated to development since there is nothing to test at the beginning. Thus we set  $u = 1$  until some time. For a small project all the modules are completed and only debugging is needed. Then we have  $u = 0$ . For a large project, we need to keep constructing while debugging becomes necessary to control the error growth. Then we have  $u < 1$ , implying that some testing and debugging should begin. There are two sub-cases for a large project we need to consider. First, when the project duration  $T$  is large, it's feasible to finish all modules by doing concurrent development and testing. Let  $T_0$  be the time when all the  $N$  modules are finished, i.e.,  $n(T_0) = N$ . Beyond  $T_0$ , no further development is needed so it is optimal to set  $u = 0$  for the rest of the project duration and put all the effort on testing and debugging. We call such projects *relaxed*. The second case is that it is not feasible to finish all  $N$  modules using concurrent development and debugging. Then at some time  $T_2$ , all the effort is again devoted to write modules. Between  $T_2$  and  $T$ , we have  $u = 1$ . We call such projects *tight*. We solve the problem for a

large project and show that the solution form for a small project is an extreme case of the solution for a large relaxed project.

### Case 1a: Large Relaxed Project

In the beginning,  $u = 1$  for  $0 < t \leq T_1$  ( $T_1$  is to be determined), we solve (5) analytically to get  $n(t)$ :

$$n(t) = \left( -k_0 + \sqrt{k_0^2 + 2k_1 t} \right) / k_1 \quad (\text{A.3})$$

Plugging into (A.2) the initial conditions  $t_1 = 0$  and  $m_1 = 0$  together with the expressions  $f(t) = k_3 \dot{n}(t)$  and  $q(t) = [k_2 + k_4 n(t)] \dot{n}(t)$  obtained from (6), we have:

$$m(t) = -k_4 n / k_3 + (k_4 + k_2 k_3) / k_3^2 \cdot (e^{k_3 n} - 1) \quad (\text{A.4})$$

Next, in the interval  $T_1 < t < T_0$  ( $T_0$  is also to be determined),  $0 < u(t) < 1$ . Then from Equation (11) we have  $H_u = 0$  in order for  $u(t)$  to be optimal. In order for  $H_u$  to stay zero in this interval, we should have  $\dot{H}_u = 0$ . From Equation (11), we can see  $H_u$  is a function of variables  $n$ ,  $m$ ,  $\lambda_1$  and  $\lambda_2$ . Then  $\dot{H}_u$  is a function of  $\dot{n}$ ,  $\dot{m}$ ,  $\dot{\lambda}_1$  and  $\dot{\lambda}_2$ . Plugging the expressions of (1), (2), (9) and (10) into  $\dot{H}_u$  and after some algebraic manipulation, we can show that

$$\dot{H}_u = -\frac{\lambda_2 k_5}{n^2 (k_0 + k_1 n)} (m - k_2 n - k_4 n^2) \quad (\text{A.5})$$

So the requirement of  $\dot{H}_u = 0$  leads to the following equation:

$$m(t) = [k_2 + k_4 n(t)] n(t) \quad (\text{A.6})$$

Plugging this equation into (6), we can obtain:

$$\dot{n}(t) = \frac{-k_5 m / n}{k_4 n - k_3 m - (k_0 + k_1 n) \cdot k_5 m / n} \quad (\text{A.7})$$

Then from (5), we have

$$u(t) = \frac{-(k_0 + k_1 n) \cdot k_5 m / n}{k_4 n - k_3 m - (k_0 + k_1 n) \cdot k_5 m / n} \quad (\text{A.8})$$

Construction effort  $u(t)$  in the interval  $T_1 < t < T_0$  can be shown to decrease over time  $t$ . Therefore, the debugging effort will increase as the project continues in this time interval. This result is intuitive: as time moves on, more attention should be devoted to debugging to maintain system quality.

In our problem, the Hamiltonian (8) is linear in the control variable  $u$ . An additional necessary condition analogous to the second-order condition in calculus, called *the generalized Legendre-Clebsch Condition*,  $(-1)\frac{\partial}{\partial u}\left[\frac{d^2 H_u}{dt^2}\right] < 0$  is verified to hold in this problem.

In the third interval of  $T_0 \leq t \leq T$ ,  $u(t) = 0$  and  $n(t) = N$  since all  $N$  modules are finished and all the programming effort is spent on testing modules to remove inter-modules errors. Solving equation (6), we can get  $m(t)$ :

$$m(t) = m(T_0)e^{-k_5(t-T_0)/N} \quad (\text{A.9})$$

The number of errors  $m(t)$  decreases exponentially as a function of time  $t$ . This is exactly the form of the Goel-Okumoto software reliability growth model (Goel and Okumoto, 1979) which is used extensively in the software reliability literature. The Goel-Okumoto model is a special case of our more general model where  $u(t) = 0$ .

To completely solve the problem, we need to find the values of two switching points  $T_1$  and  $T_0$ . We can solve  $N_0 (=n(T_1))$  by equating equations (A.4) and (A.6) at  $T_1$  since  $m(t)$  is a continuous function of time  $t$ .  $N_0$  can only be obtained numerically. Then from (A.3), we can obtain  $T_1$  as the following:

$$T_1 = (k_1 N_0^2 + 2k_0 N_0) / 2 \quad (\text{A.10})$$

The threshold  $N_0$  is used to classify projects between large and small ones. If the number of modules to be finished in a project  $N$  is larger than  $N_0$ , then some additional construction effort is required beyond  $T_1$ . Such a project is termed *large*. If  $N$  is smaller than  $N_0$ , then the full construction effort period stops at some time  $T_1'$  (earlier than  $T_1$ ) and full debugging effort takes over for the rest of the project duration. Such a project is termed *small*. The solution form of a small project is an extreme case of the solution form of a large relaxed project. The value of  $T_1'$  is obtained from (A.3) as shown in the following:

$$T_1' = (k_1 N^2 + 2k_0 N) / 2 \quad (\text{A.10a})$$

To find the switching point  $T_0$ , we solve the differential equation (A.7):

$$t = \frac{k_1 n(t)^2 + 2k_0 n(t)}{2} + \frac{k_3 [n(t)^2 - N_0^2]}{2k_5} - \frac{n(t) - N_0}{k_5} + \frac{k_2}{k_4 k_5} \text{Log} \left( \frac{k_2 + k_4 n(t)}{k_2 + k_4 N_0} \right) \quad (\text{A.11})$$

At  $T_0$ , all  $N$  modules are finished, i.e.,  $n(T_0) = N$ . So from (A.11), we determine  $T_0$  as the following:

$$T_0 = \frac{k_1 N^2 + 2k_0 N}{2} + \frac{k_3(N^2 - N_0^2)}{2k_5} - \frac{(N - N_0)}{k_5} + \frac{k_2}{k_4 k_5} \text{Log} \left( \frac{k_2 + k_4 N}{k_2 + k_4 N_0} \right). \quad (\text{A.12})$$

### Case 1b: Large Tight Project

The solutions in the three time intervals are very similar to those in Case 1a except in the third interval where  $T_2 < t \leq T$ . The switching point  $T_1$  is the intersection of the curves (A.4) and (A.6) which is same for both cases. Thus we obtain the same value of  $T_1$  for both cases. Hence we focus on finding the switching point  $T_2$ .

In the interval  $T_2 \leq t \leq T$ ,  $u(t) = 1$ . We can solve Equation (5) analytically to get  $n(t)$ :

$$n(t) = \frac{-k_0 + \sqrt{k_0^2 + 2k_1 t'}}{k_1} \quad (\text{A.13})$$

where  $t' = t - \left( T - \frac{k_1 N^2 + 2k_0 N}{2} \right)$ . By utilizing the general form of  $m(t)$  in (A.2), we solve  $m(t)$  as:

$$m(t) = -\frac{k_4 n}{k_3} + \frac{k_4 + k_2 k_3}{k_3^2} \left( e^{k_3(n-N_2)} - 1 \right) + e^{k_3(n-N_2)} \frac{k_3 M_2 + k_4 N_2}{k_3} \quad (\text{A.14})$$

where  $N_2 = n(T_2)$  and  $M_2 = m(T_2)$ .

The second switching time  $T_2$  needs to be solved by equating two equations. On one hand,  $n(t)$  satisfies the same module growth equation (A.7) in the interval  $T_1 < t \leq T_2$ , as in Case 1a and thus the same relationship holds between time  $t$  and  $n(t)$  as described by (A.11). We can get  $T_2$  from (A.11):

$$T_2 = \frac{k_1 N_2^2 + 2k_0 N_2}{2} + \frac{k_3[N_2^2 - N_0^2]}{2k_5} - \frac{N_2 - N_0}{k_5} + \frac{k_2}{k_4 k_5} \text{Log} \left( \frac{k_2 + k_4 N_2}{k_2 + k_4 N_0} \right) \quad (\text{A.15})$$

On the other hand, by evaluating  $n(t)$  at  $T_2$ , we can get the following equation from (A.13):

$$T_2 = \left( T - \frac{k_1 N^2 + 2k_0 N}{2} \right) + \frac{k_1 N_2^2 + 2k_0 N_2}{2} \quad (\text{A.16})$$

We can solve for  $N_2$  by equating the two equations (A.15) and (A.16). Then we can plug  $N_2$  back into either (A.15) or (A.16) to get  $T_2$ .

## B. Expressions for $\lambda_1$ and $\lambda_2$

We point out that  $\lambda_1$  is positive and  $\lambda_2$  is negative during the whole project duration. To see this, we can simplify (10) to be  $\dot{\lambda}_2 = -\lambda_2[k_3\dot{n} - k_5(1-u)/n]$ , the solution to which is:

$$\lambda_2(t) = \lambda_2(T)e^{\int_t^T [k_3\dot{n} - k_5(1-u)/n] dx} \quad (\text{A.17})$$

The terminal condition is  $\lambda_2(T) = -1$ ; our objective is to minimize  $m(T)$ . Therefore,  $\lambda_2$  is negative during the whole project duration for both large and small projects.

We verify that  $\lambda_1$  is positive for a large project. From Equation (11), we define  $h_1 = (k_0 + k_1 \cdot n)^{-1}$  and  $h_2 = [c_1(n, m)/(k_0 + k_1 \cdot n) + c_2(n, m)]$ . Then in the interval  $0 < t < T_1$ , we have

$$\lambda_1 = (H_u - \lambda_2 h_2) / h_1 \quad (\text{A.18})$$

where  $H_u$  can be obtained easily by integrating (A.5) with terminal condition  $H_u(T_1) = 0$ :

$$H_u(t) = \int_t^{T_1} \frac{\lambda_2 k_5}{n^2 (k_0 + k_1 n)} (m - k_2 n - k_4 n^2) \cdot dx \quad (\text{A.19})$$

We can see that  $H_u(t)$  is positive in this interval since  $m < k_2 n + k_4 n^2$  in this interval. Therefore  $\lambda_1$  is positive in this interval since  $\lambda_2$  has been shown to be negative in (A.17) and  $h_2$  is always positive.

In the interval  $T_1 < t < T_0$  for a relaxed project and  $T_1 < t < T_2$  for a tight project,  $H_u(t) = 0$ . Hence,

$$\lambda_1 = -\lambda_2 h_2 / h_1 > 0 \quad (\text{A.20})$$

Finally, in the interval  $T_0 < t < T$  for a relaxed project, we have  $u = 0$ . Then from (9), we have  $\dot{\lambda}_1 = -\lambda_2 k_5 m / n^2 > 0$ . Then,

$$\lambda_1(t) = \lambda_1(T_0) - \int_{T_0}^t \lambda_2 k_5 m / n^2 dx > 0 \quad (\text{A.21})$$

For a tight project in the interval  $T_2 < t < T$ , we have the same expression for  $\lambda_1$  as given in (A.18) except that  $H_u$  is now given by:

$$H_u(t) = -\int_{T_2}^t \frac{\lambda_2 k_5}{n^2 (k_0 + k_1 n)} (m - k_2 n - k_4 n^2) \cdot dx \quad (\text{A.22})$$

with the initial condition  $H_u(T_2) = 0$ . Notice that  $m > k_2 n + k_4 n^2$  in this interval. Therefore we have positive  $H_u(t)$  and hence positive  $\lambda_1$  in this interval.

Again, a small project is just an extreme case of a large relaxed project. The value of  $\lambda_1$  is given by (A.18) for  $0 < t < T_1'$  and by (A.21) for  $T_1' < t < T$  with  $T_1'$  replacing  $T_1$  in (A.19) and  $T_0$  in (A.21).

### C. Proof of Corollary 1 by Contradiction

Suppose we have a situation in Figure 5 where  $u=0$  for  $T_i < t < T_{i+1}$  and  $u=1$  for  $T_{i+1} < t < T_{i+2}$ . At the switching point  $T_i$ , we have  $H_u=0$  according to the necessary condition (11) since  $H_u$  is continuous in this problem. According to (A.5), we have

$$H_u(t) = -\int_{T_i}^t \frac{\lambda_2 k_5}{n^2(k_0 + k_1 n)} (m - k_2 n - k_4 n^2) \cdot dx \quad (\text{A.23})$$

which remains negative for  $T_i < t < T_{i+1}$  as long as it becomes negative after  $T_i$ . The reason is that, when all effort is spent on debugging ( $u=0$ ),  $m$  is always decreasing and  $n$  stays the same. In addition, the adjoint variable  $\lambda_2$  is shown in Appendix B to be negative during the whole project duration. Since  $H_u$  is negative at  $T_{i+1}$ , due to continuity,  $H_u$  is also negative at  $T_{i+1}^+$ . Thus  $u=1$  for  $T_{i+1} < t < T_{i+2}$  would violate the necessary condition (11). Therefore, alternating between pure construction and pure debugging cannot be optimal.

### D. Signs of $dN_0 / dk_i, i=2,3,4$

The threshold value  $N_0$  is the positive intersection point of two curves (A.4) and (A.6), i.e., it is the positive solution of  $s(n, k_2, k_3, k_4) = 0$  where

$$s(n, k_2, k_3, k_4) = -\frac{k_4 n}{k_3} + \frac{k_4 + k_2 k_3}{k_3^2} (e^{k_3 n} - 1) - (k_2 + k_4 n)n, \quad (\text{A.24})$$

Then we have

$$\frac{dN_0}{dk_i} = -\frac{\partial s(n, k_2, k_3, k_4) / \partial k_i}{\partial s(n, k_2, k_3, k_4) / \partial n} \Big|_{n=N_0}, \quad i = 2, 3, 4 \quad (\text{A.25})$$

We first show that  $\frac{\partial s}{\partial n} \Big|_{n=N_0}$  is positive. First we have  $s(0, k_i) = 0$ ,  $\frac{\partial s}{\partial n} \Big|_{n=0} = 0$  and

$\frac{\partial^2 s}{\partial n^2} \Big|_{n=0} = k_2 k_3 - k_4$ . We require  $k_2 k_3 - k_4 < 0$  in order to have a positive  $N_0$  since  $\frac{\partial^2 s}{\partial n^2}$  increases

monotonically ( $\frac{\partial^3 s}{\partial n^3} = k_3(k_4 + k_2 k_3)e^{k_3 n} > 0$  for all  $n$ )<sup>1</sup>. Therefore,  $s(n, k_2, k_3, k_4) = 0$  has only one

positive solution. Then  $\frac{\partial s}{\partial n} \Big|_{n=N_0} > 0$  since  $s(n, k_2, k_3, k_4)$  turns from negative to positive at

$n = N_0$ . So, the sign of  $\frac{dN_0}{dk_i}$  is opposite to the sign of  $\frac{\partial s}{\partial k_i} \Big|_{n=N_0}$ . And we

$$\frac{\partial s}{\partial k_2} \Big|_{n=N_0} = \frac{1}{k_3} (e^{k_3 N_0} - 1) - N_0 = \frac{k_3 k_4}{k_4 + k_2 k_3} N_0^2 > 0 \quad (\text{A.26})$$

$$\frac{\partial s}{\partial k_3} \Big|_{n=N_0} = \frac{N_0^2 k_2 k_3^2 (k_2 + k_4 N_0) + k_4 N_0 \cdot \partial s(n, k_i) / \partial n \Big|_{n=N_0}}{k_3 (k_4 + k_2 k_3)} > 0 \quad (\text{A.27})$$

$$\frac{\partial s}{\partial k_4} \Big|_{n=N_0} = -\frac{N_0}{k_3} + \frac{1}{k_3^2} (e^{k_3 N_0} - 1) - N_0^2 = -\frac{k_2 k_3}{k_4 + k_2 k_3} N_0^2 < 0 \quad (\text{A.28})$$

To summarize, we have shown  $\frac{dN_0}{dk_2} < 0$ ,  $\frac{dN_0}{dk_3} < 0$ , and  $\frac{dN_0}{dk_4} > 0$ .

When  $k_4 N_0$  is much greater than  $k_2$  and  $k_4$  much greater than  $k_2 k_3$ , then (A.24), which  $N_0$  should satisfy, becomes

$$0 = -n / k_3 + (e^{k_3 n} - 1) / k_3^2 - n^2.$$

Therefore  $N_0$  becomes independent of  $k_4$  under both conditions.

### E. Signs of $dT_0 / dk_i, i=0, \dots, 5$

Similarly, we can perform a sensitivity analysis on  $T_0(N_0, k_0, \dots, k_5)$  with respect to  $k_i, i=0, \dots, 5$ .

From Equation (A.12), we have,

$$dT_0 / dk_0 = N > 0 \quad (\text{A.29})$$

$$dT_0 / dk_1 = N^2 / 2 > 0 \quad (\text{A.30})$$

To find the sign of  $\frac{dT_0}{dk_2}$ , first we have  $\frac{\partial T_0}{\partial N_0} = -\frac{1}{k_5 (k_2 + k_4 N_0)} \frac{\partial s}{\partial n} \Big|_{n=N_0} < 0$  from (A.12). Also,

---

<sup>1</sup> Considering the case  $k_2 k_3 - k_4 > 0$  does not bring more insight except that concurrent construction and debugging starts at time  $t=0$ , instead of the point in time after  $N_0$  modules have been constructed.

$$\frac{\partial T_0}{\partial k_2} = \frac{1}{k_4 k_5} \left[ \text{Log} \left( \frac{k_2 + k_4 N}{k_2 + k_4 N_0} \right) + \frac{k_2}{k_2 + k_4 N} - \frac{k_2}{k_2 + k_4 N_0} \right]$$

which is positive since  $\frac{\partial T_0}{\partial k_2} \Big|_{N=N_0} = 0$  and  $\frac{d}{dN} \left( \frac{\partial T_0}{\partial k_2} \right) = \frac{1}{k_5} \frac{k_4 N}{(k_2 + k_4 N)^2} > 0$ . Then,

$$\frac{dT_0}{dk_2} = \frac{\partial T_0}{\partial k_2} + \frac{\partial T_0}{\partial N_0} \frac{dN_0}{dk_2} > 0 \quad (\text{A.31})$$

$$\frac{dT_0}{dk_3} = \frac{1}{2k_5} (N^2 - N_0^2) + \frac{\partial T_0}{\partial N_0} \frac{dN_0}{dk_3} > 0 \quad (\text{A.32})$$

It is easy to verify that  $\frac{\partial T_0}{\partial k_4} = -\frac{k_2}{k_4} \frac{\partial T_0}{\partial k_2}$ . Then we have

$$\frac{dT_0}{dk_4} = \frac{\partial T_0}{\partial k_4} + \frac{\partial T_0}{\partial N_0} \frac{dN_0}{dk_4} < 0 \quad (\text{A.33})$$

The first term in (A.12) is the time needed to finish the whole project by using all the programming effort. Therefore, it is less than  $T_0$ . So,

$$\frac{dT_0}{dk_5} = -\frac{1}{k_5} \left( T_0 - \frac{k_1 N^2 + 2k_0 N}{2} \right) < 0 \quad (\text{A.34})$$

Under the conditions that  $k_4 N_0$  is much greater than  $k_2$  and  $k_4$  much greater than  $k_2 k_3$ , we can easily show that  $T_0$  will be independent of  $k_4$  by solving Equation (A.7) directly:

$$T_0 = \frac{k_1 N^2 + 2k_0 N}{2} + \frac{k_3 (N^2 - N_0^2)}{2k_5} - \frac{(N - N_0)}{k_5}$$

The value of  $T_0$  is independent of  $k_4$  since  $N_0$  has been shown to be independent of  $k_4$  under the same conditions. We can explain the result intuitively. When  $k_4 N$  is much greater than  $k_2$ , which is true within  $T_1 < t < T_0$  in the parameter space we use, from (A.8),  $u(t)$  becomes

$$u(t) = \frac{-(k_0 + k_1 n) \cdot k_5}{1 - k_3 n - (k_0 + k_1 n) \cdot k_5}, \text{ which is independent of } k_4. \text{ Then } T_0 \text{ is independent of } k_4 \text{ since both}$$

$T_1$  and the time to finish the remaining module after  $T_1$  are independent of  $k_4$ .

## F. Number of bugs $m(T)$ for the fixed allocation policy

With  $u(t) = u_0$ , we have  $f(t) = k_3 \dot{n}(t) - k_5 / n(t) \cdot (1 - u_0)$  and  $q(t) = [k_2 + k_4 n(t)] \dot{n}(t)$  from Equation (6). Then we have

$$\int_x^t f(x)dx = \int_x^t \left[ k_3 \dot{n}(x) - \frac{k_5}{n(x)} (1-u_0) \right] dx = [a \cdot n(t) - b \cdot \ln n(t)] - [a \cdot n(x) - b \cdot \ln n(x)]$$

where  $a = k_3 - \frac{k_1 k_5}{u_0} (1-u_0)$  and  $b = \frac{k_0 k_5}{u_0} (1-u_0)$ .

From (A.2) with initial conditions  $t_1 = 0$  and  $m_1 = 0$ , we have:

$$\begin{aligned} m(T) &= \int_0^T [k_2 + k_4 n(x)] \dot{n}(x) e^{\int_x^T f(y)dy} dx = e^{a \cdot N} N^{-b} \int_0^T [k_2 + k_4 n(x)] \dot{n}(x) e^{-a \cdot n(x)} n(x)^b dx \\ &= e^{a \cdot N} N^{-b} a^{-(b+1)} \left[ k_2 \Gamma_{aN}(b+1) + \frac{k_4}{a} \Gamma_{aN}(b+2) \right] \end{aligned} \quad (\text{A.35})$$

where the incomplete gamma function  $\Gamma_z(p)$  is defined in (Korn and Korn, 2000):

$$\Gamma_z(p) = \int_0^z t^{p-1} e^{-t} dt, \quad p > 0.$$

In the special case of  $u_0 = 1$ , it is easy to verify that (A.35) becomes (A.4).

## Appendix G: Derivation of the Necessary Condition of Optimal $T$

In order for  $T$  to be the optimal software project schedule, we have the first-order terminal condition:

$$H(T) - \dot{G}(T) = 0 \quad (\text{A.36})$$

Also,  $\lambda_2(t)$  needs to satisfy the terminal condition:

$$\lambda_2(T) = -h'(m(T)).$$

We can rewrite  $H(t) = H_u u(t) - \lambda_2 k_5 m(t) / n(t)$ . Then (A.36) can be written as:

$$\dot{G}(T) = H_u(T) u(T) + k_5 m(T) / N \cdot h'(m(T)) \quad (\text{A.37})$$

Only for large tight projects (Figure 4) can we have  $u(T) \neq 0$ . We only need to find an expression for  $H_u(T)$  for such projects. Using the expression for  $\dot{H}_u$  in (A.5), we can find  $H_u(T)$  for large tight projects as

$$H_u(T) = - \int_{T_2}^T \frac{\lambda_2 k_5}{n^2(k_0 + k_1 n)} (m - k_2 n - k_4 n^2) \cdot dt \quad (\text{A.38})$$

where  $\lambda_2(t)$  is given in (A.17).
